1 **Coevolution of brain size and longevity in parrots**

2

3 Simeon Q. Smeele<sup>1,2,3,4,\*</sup>, Dalia A. Conde<sup>6,4,5</sup>, Annette Baudisch<sup>4</sup>, Simon Bruslund<sup>7,8</sup>, Andrew Iwaniuk<sup>9</sup>,

4 Johanna Staerk<sup>4,5,6</sup>, Timothy F. Wright<sup>10</sup>, Anna M. Young<sup>11</sup>, Mary Brooke McElreath<sup>1,2,^</sup>, Lucy

5 Aplin<sup>1,12,^</sup>

6

7 <sup>1</sup> Cognitive & Cultural Ecology Research Group, Max Planck Institute of Animal Behavior, Radolfzell,

8 Germany

9 <sup>2</sup> Department of Human Behavior, Ecology and Culture, Max Planck Institute for Evolutionary

10 Anthropology, Leipzig, Germany

11 <sup>3</sup> Department of Biology, University of Konstanz, Konstanz, Germany

12 <sup>4</sup> Interdisciplinary Centre on Population Dynamics, University of Southern Denmark, Odense,

13 Denmark

14 <sup>5</sup> Department of Biology, University of Southern Denmark, Odense, Denmark

15 <sup>6</sup> Species360 Conservation Science Alliance, Bloomington, USA

16 <sup>7</sup> Vogelpark Marlow gGmbH, Marlow, Germany

17 <sup>8</sup> European Association of Zoos and Aquaria, Parrot Taxon Advisory Group, Amsterdam, The

18 Netherlands

19 <sup>9</sup> Department of Neuroscience, University of Lethbridge, Lethbridge, Canada

20 <sup>10</sup> Biology Department, New Mexico State University, Las Cruces, USA

21 <sup>11</sup> Department of Biology and Earth Science, Otterbein University, Westerville, USA

22 <sup>12</sup> Centre for the Advanced Study of Collective Behaviour, University of Konstanz, Konstanz, Germany

23 <sup>^</sup> Joint senior authors

24 <sup>\*</sup> Corresponding author: [ssmeele@ab.mpg.de](mailto:ssmeele@ab.mpg.de)

25

26

27 **Abstract**

28 Parrots are well-known for their exceptionally long lives and cognitive complexity. While previous  
29 studies have demonstrated a correlation between longevity and brain size in a variety of taxa, little  
30 research has been devoted to understanding this link in parrots. Here we employed a large-scale  
31 comparative analysis that investigated the influence of brain size and life history variables on patterns  
32 of longevity. Specifically, we addressed two hypotheses for evolutionary drivers of longevity: the  
33 *Cognitive Buffer Hypothesis*, which proposes that increased cognitive abilities enable longer life  
34 spans, and the *Expensive Brain Hypothesis*, which holds that the increase in life span is caused by  
35 prolonged developmental time of and increased parental investment in, large brained offspring. We  
36 estimated life expectancy from detailed zoo records for 133,818 individuals across 244 parrot species.  
37 Using Bayesian structural equation models, we found a consistent correlation between relative brain  
38 size and life expectancy in parrots. This correlation was best explained by a direct effect of relative  
39 brain size. Notably, we found no effects of developmental time, clutch size, or age at first  
40 reproduction. Our results provide support for the *Cognitive Buffer Hypothesis*, and demonstrate a  
41 principled Bayesian approach that addresses data uncertainty and imputation of missing values.

42

43 **Keywords**

44 Psittaciformes; life expectancy; cognitive evolution; Bayesian structural equation model; cognitive  
45 buffer hypothesis; expensive brain hypothesis

46

## 47 **Introduction**

48 Evolutionary theories of ageing predict the inevitability of senescence in most iteroparous multicellular  
49 organisms (1–4). However, recent studies have highlighted the diversity of patterns and timing in  
50 which different taxa experience senescence, revealing species-specific patterns of longevity linked  
51 with allometry and life history variables (5,6). Generally, larger bodied species tend to live longer (7),  
52 but longevity is also associated with other variables such as diet, latitude and sociality (8,9). Perhaps  
53 of most recent interest, brain size has been correlated with longevity across diverse taxa ranging from  
54 amphibians (10) to primates (11). However, the causal pathways for this relationship between brain  
55 size and longevity are not yet well established.

56

57 Three non-mutually exclusive hypotheses have been proposed to explain the correlated evolution of  
58 larger brains and longer lifespans. First, the *Cognitive Buffer Hypothesis* posits that increased  
59 cognitive flexibility enabled by a relatively larger brain allows species to solve problems that would  
60 otherwise increase their extrinsic mortality, hence allowing for increased longevity (12). Second, the  
61 *Delayed Benefits Hypothesis* reverses the directionality of this argument, positing that longevity drives  
62 the evolution of larger brains. In other words, long-lived species evolve larger brains because they  
63 can benefit most from the cognitive machinery that supports learning (13). These first two hypotheses  
64 can be difficult to disentangle in comparative studies, as they both predict a direct association  
65 between relative brain size and longevity. Third, the *Expensive Brain Hypothesis* argues that there is  
66 an indirect association between brains and longevity, with an investment in expensive brain tissue  
67 slowing down the pace of life through increased developmental time and increased parental  
68 investment per offspring (14). Previous work in mammals, amphibian and birds has found mixed  
69 support for all three hypotheses (15,16). For example, Isler et al. (14) showed that larger brained,  
70 monotokous (single offspring per reproduction), precocial mammals had longer developmental  
71 periods. This longer developmental period led to a prolonged life span; in other words, the effect of  
72 brain size on longevity was indirect. In contrast, Jiménez-Ortega et al. (17) showed both a direct and  
73 an indirect effect of absolute brain size on lifespan in birds, with larger brained species also living  
74 longer independently from their developmental period.

75

76 Parrots (Psittaciformes) are famous for both their long lives and complex cognition (18,19), with  
77 lifespans and relative brain size on par with primates (20). Indeed, recent studies on the genetics of  
78 longevity and cognition in parrots have revealed positive selection on lifespan-prolonging genes, as  
79 well as genes related to increased cognitive abilities and cell repair (21–23). Parrots are also  
80 morphologically and ecologically diverse, with an extensive global distribution of almost 400 species,  
81 ranging in size from adult yellow-capped pygmy parrots (*Micropsitta keiensis*, from 12 g) to kakapo  
82 (*Strigops habroptilus*, up to 3000 g) (24). In the first comparative study to examine longevity in  
83 parrots, Munshi-South et al. (18) used maximum longevity records from 162 species, and found that  
84 both diet and communal roosting were correlated with longevity, with granivorous and communal  
85 roosting species living the longest on average. While not considering longevity, the potential drivers of  
86 the evolution of brain size in neotropical parrots were explored in Schuck-Paim et al. (25), finding that  
87 brain size is associated with environmental and seasonal variability. Finally, highlighting the  
88 importance of life history variation, Young et al. (26) found that longer lived parrots were more likely to  
89 be threatened. However, perhaps surprisingly, little research effort has been invested in  
90 understanding the link between longevity and brain size in parrots.

91

92 One of the greatest challenges for comparative life history studies is sourcing good quality data (27).  
93 For instance, the above studies all depended on maximum (or median) recorded lifespan, many used  
94 regressions on residuals (see e.g., DeCasien et al. (16)) and some only included absolute brain size  
95 (see e.g., Jiménez-Ortega et al. (17)). Maximum recorded lifespan can be a problematic measure  
96 because it represents the longest-lived known individual and is therefore highly sensitive to sample  
97 size. Making matters worse, how much sample size influences results depends on the pattern of age-  
98 related mortality itself (28). For species where most individuals die around the same age, smaller  
99 samples are more likely to approximate maximum longevity than in species with many extreme ages  
100 of death. Therefore, preferable to a single-point measure is a measure that accounts for all  
101 information available. Life expectancy is such a measure and has been found to be the most  
102 appropriate measure of pace of life (29). It calculates the average age at death based on information  
103 across the full age range and therefore takes into account all available information. While life  
104 expectancy can be sensitive to both intrinsic and extrinsic sources of mortality, the use of captive

105 records allows the removal of extrinsic sources of mortality as much as possible, thereby focusing on  
106 senescence. It is also thought to be the best measure of pace of life (29). Yet even when using  
107 captive data, other variables and shared evolutionary history create confounds that need to be  
108 addressed within a multivariate framework. A principled way to decide which covariates to include is  
109 the use of Directed Acyclical Graphs (DAG) (30,31). Based on a specific hypothesis, a DAG  
110 represents all potential causal paths in the system by arrows. Conditional on the DAG being true, the  
111 backdoor criterion informs which variable should be included and which should not be included.

112

113 Here, we present a phylogenetic comparative analysis focused on brain size and its effects on  
114 longevity in parrots. First, we estimate life expectancy from Species360's Zoological Information  
115 Management System (ZIMS) with records of 133,818 individuals across 244 parrot species. We then  
116 test for a correlation between life expectancy and relative brain size after removing the effect of  
117 covariates. Third, we used a DAG to distinguish between two possible pathways for this correlation.  
118 The *Cognitive Buffer Hypothesis* predicts a direct effect of relative brain size on life expectancy, with  
119 larger brained species living longer (12), while the *Expensive Brain Hypothesis* predicts that the effect  
120 of brain size on life expectancy is indirect, emerging from increased developmental time and parental  
121 investment per offspring (14). In this case, we expect that any relationship between brain size and life  
122 expectancy will be reduced when also including parental investment (clutch size) and developmental  
123 time in the model. While the *Delayed Benefits Hypothesis* would also predict a direct relationship  
124 between relative brain size and longevity (13), it would argue for reversed directionality (extended  
125 longevity leads to larger brain sizes). As this hypothesis was evoked to explain hominid evolution with  
126 multiple overlapping generations, and we are explicitly focusing on variance in longevity across  
127 species, we did not examine it further in this analysis. Overall, our study demonstrates a robust  
128 methodology for comparative life history analysis using a comprehensive measure of life expectancy  
129 in a Bayesian statistical framework. Moreover, it provides the most comprehensive analysis of life  
130 expectancy and longevity in Psittaciformes to date, and contributes to a broader understanding of this  
131 understudied group.

132

133 **Materials and Methods**

134 *Estimating life expectancy*

135 We obtained data on birth and death dates from Species360's ZIMS. After cleaning (see  
136 Supplementary Methods) we included records for 133,818 individuals across 244 species. To  
137 estimate life expectancy, we implemented Bayesian Survival Trajectory Analysis (BaSTA, (32)), which  
138 allowed us to make inferences on age-specific survival based on census data when ages of some  
139 individuals are unknown. The model, implemented in R (33), uses a Markov Chain Monte Carlo  
140 (MCMC) algorithm with Metropolis-Hastings sampling of mortality parameters and latent times of birth.  
141 Here, we used a Siler hazard model (34) for each species, given by

$$142 \quad \mu(x) = \exp[a_0 - a_1x] + c + \exp[b_0 + b_1x],$$

143 where  $a_1, c, b_1 > 0$  and  $a_0, b_0 \in (-\infty, \infty)$ . These five parameters can fit infant and juvenile mortality  
144 (controlled by  $a_0$  and  $a_1$ ), age independent (adult) mortality ( $c$ ) as well as senescent mortality  
145 (controlled by  $b_0$  for initial mortality and  $b_1$  for the rate of aging). Cumulative survival can be calculated  
146 as

$$147 \quad S(x) = \exp\left[-\int_0^x \mu(t)dt\right].$$

148 Life expectancy at birth is calculated as

$$149 \quad e_0 = \int_0^{\infty} S(x)dx.$$

150 We used the Gelman-Rubin statistic (Rhat, (35)) to determine if models converged and visually  
151 assessed the traces and model goodness of fit. When models did not converge, they were rerun with  
152 longer burn-in and more iterations. If models clearly did not fit the data, the results were excluded.  
153 This was the case for 27 out of 244 species. In most cases this was due to issues with data quality  
154 (e.g., when the number of individuals without a recorded date of death was too high).

155

156 *Life-history covariates*

157 We collected body mass data from ZIMS. Additional body mass measurements were included from  
158 the literature if no captive records were available for a species (27). We then used a Bayesian multi-  
159 level model to extract species-level averages and standard errors (see Supplemental Methods more  
160 details). Brain mass was collected by AI, from Iwaniuk et al. (36), from Schuck-Paim et al. (25) and  
161 from Ksepka et al. (37), and similarly to body size, we fitted a Bayesian multi-level model to extract  
162 species-level averages and standard errors. We also collected data for six additional potential  
163 explanatory variables, based on previously proposed causal relationships with life expectancy: diet  
164 (estimated protein content of main food items) (18), insularity (whether a species includes a  
165 continental range or not) (18), maximum latitudinal range (as a proxy for environmental variability)  
166 (38), clutch size (39), developmental time (from the start of incubation until fledging) and age of first  
167 possible reproduction (AFR) (14). Diet, insularity, maximum latitude range, clutch size and  
168 developmental time were collected from the literature. When data were not freely available, we  
169 collected estimates directly from experts (see Supplemental Methods for the details). Finally, AFR is  
170 unknown for the large majority of parrot species. We therefore estimated it directly from the  
171 distribution of first breeding records in the ZIMS, using the 5% percentile. To control for possible  
172 issues arising from low sample sizes, we restricted this analysis to species with at least 30 breeding  
173 individuals.

174

175 We used a DAG (see Figure 1) to decide how to incorporate variables in the statistical models,  
176 accounting for their influences on each other in proposed causal pathways. It is important to note that  
177 evolutionary time is not included explicitly in the DAG, thus arrows can potentially go in both  
178 directions, representing evolutionary feedbacks. However, in our view, it represents the most  
179 principled representation of the potential causal relationships for evolution of longevity in parrots,  
180 based on available data and current knowledge. Although not depicted in the DAG, phylogenetic co-  
181 variance was assumed to influence all variables and was included in all analyses using the L2-norm  
182 and the phylogenetic tree from Burgio et al. (40).

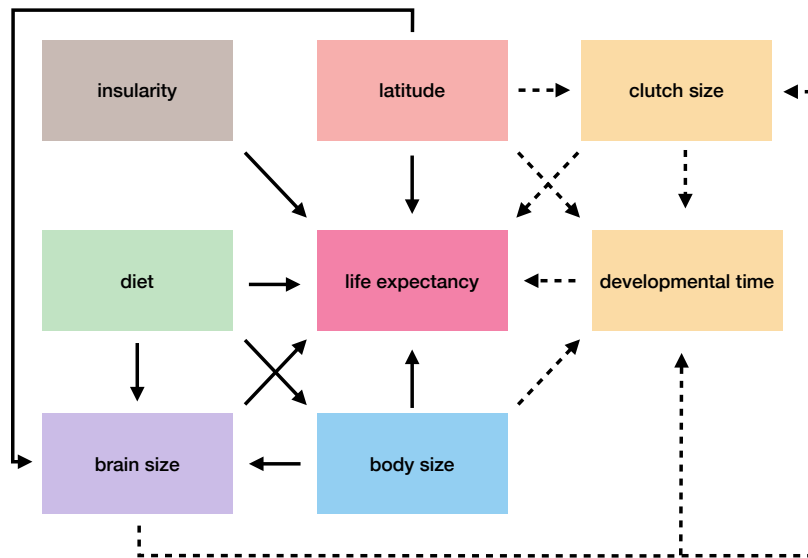

183

184 **Figure 1** Directed Acyclic Graph of the potential causal pathways that could drive parrot life expectancy. Colours  
185 represent different covariate groups and are kept consistent throughout the manuscript. Solid lines represent  
186 assumed causal effects in all models. Dashed lines represent assumed causal relationships in model 2 and 3.

187

### 188 *Statistical analysis*

189 To test for a correlation between life expectancy and relative brain size, we first constructed a  
190 Bayesian structural equation model with life expectancy as the main variable to be explained by  
191 relative brain size and four other potential covariates. We included a total of 360 species for which at  
192 least one variable was known. The structure of this first model was as follows:  $LE \sim I + BO + RB + LA$   
193  $+ D$ , where  $LE$  = standardised log life expectancy,  $I$  = insularity (binary),  $BO$  = standardised log body  
194 mass,  $RB$  = relative brain size,  $LA$  = standardised maximum latitude range and  $D$  = protein content  
195 diet (ordinal). Relative brain size was calculated as:  $BR - pBR$ , where  $BR$  = standardised log brain  
196 mass and  $pBR$  = predicted brain mass from a second model that ran simultaneously:  $pBR \sim BO$ . This  
197 is similar to residual brain size in multiple regressions, but since both models are evaluated at each  
198 step of the sampling, information flows in both directions and measurement error is modelled correctly  
199 (41). We included standard error around the mean for life expectancy, body mass and brain mass.  
200 We also included a phylogenetic variance-covariance matrix based on the phylogenetic distances  
201 calculated from Burgio et al. (40), using the L2-norm. For each variable with missing data, missing



202 values were imputed using a multinormal distribution with mean and standard deviation based on the  
203 observed data, variance-covariance based on the phylogenetic signal and means further informed by  
204 the causal relationships outlined in Figure 1. For a detailed version of the model see Supplemental  
205 Methods.

206

207 To test whether any correlation between relative brain size and longevity could be indirectly caused  
208 by developmental time, delayed juvenile periods, and/or parental investment, we ran a second model  
209 where developmental time and clutch size were included as additional covariates. Both variables were  
210 log transformed and standardised. Since data on AFR was only available for 89 species and the  
211 available data was biased towards later AFR (see Supplemental Methods for more detail), we did not  
212 attempt to impute this variable, but tested its effect in a third model limited to cases where AFR was  
213 known.

214

## 215 **Results**

216

217 Overall, we were able to estimate life expectancy for 217 species out of 244 species for which we had  
218 data. This covered all eight major genera (with at least ten species) and over half of the extant parrot  
219 species. The shortest-lived genera were the small-bodied *Psittaculirostris* and *Charmosyna*, e.g., with  
220 a life expectancy of less than 2 years for *Psittaculirostris desmarestii*. The longest-lived genera were  
221 the large-bodied *Ara* and *Cacatua*, e.g., with a life expectancy of more than 35 years for *Ara macao*  
222 (full distribution of values across the phylogenetic tree is shown in Figure 2). Similarly, there was large  
223 variability in other covariates, e.g., with brain size ranging from 1 to 22 grams, and age of first  
224 reproduction ranging from 7 months to 6 years. There was a strong phylogenetic signal in life  
225 expectancy (Figure 2b), however, covariance was very low between species that diverged longer than  
226 a fifth down the tree (Figure 3c).

227

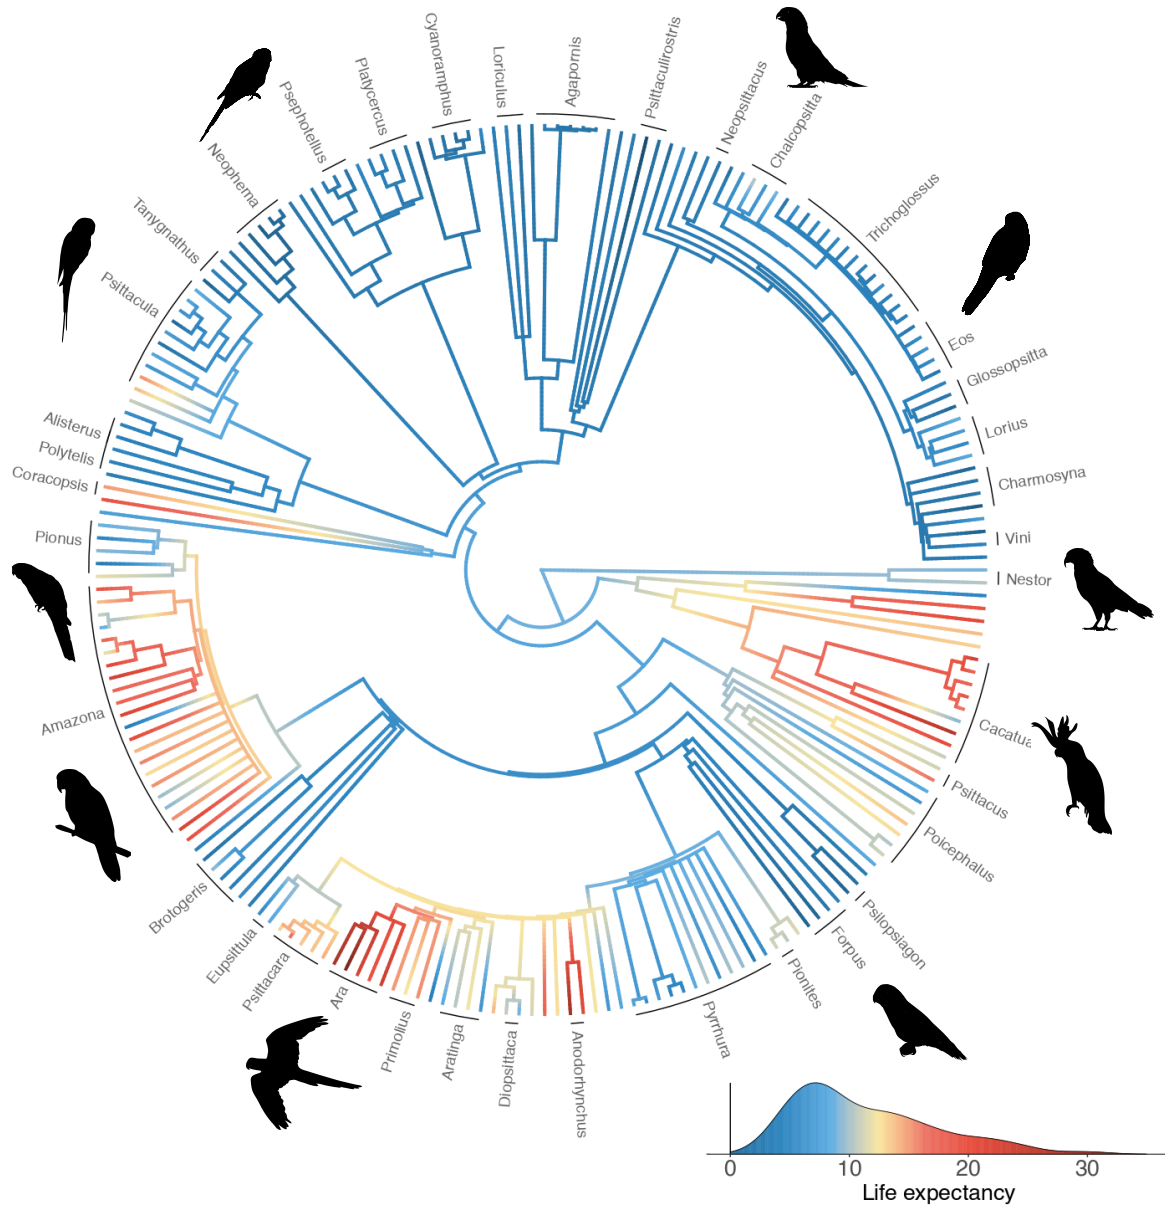

228

229 **Figure 2.** Phylogenetic tree of the 217 parrot species included in the study. Branches are coloured according to  
230 life expectancy (see density plot in bottom right), and phylogeny is based on Burgio et al. (40). Genera are  
231 named if they contain at least two species. For a version with all species named see Supplemental Figure S1.

232

233 Model 1 (without developmental time and parental investment) as well as model 2 and 3 (including  
234 these potential indirect paths) had similar estimates for the direct effect of relative brain size. As  
235 expected, body size was strongly and positively correlated with life expectancy (see Figure 3c for  
236 model 2, Supplementary Results for model 1 and 3). Relative brain size also had a small, but  
237 consistently positive, effect on life expectancy ( $\beta = 0.22$  in model 1,  $\beta = 0.18$  in model 2 and  $\beta = 0.16$   
238 in model 3; Figures 3a, 4). Of the other life history factors included, none appeared to have a large  
239 effect on life expectancy (see Figure 3d-h). In particular, model 2 showed no effect of developmental

240 time ( $\beta = 0.01$ ) or clutch size ( $\beta = -0.05$ ) on longevity, and there was no clear effect of AFR on  
241 longevity in model 3 ( $\beta = -0.11$ ). However, it should be noted that these models were designed to test  
242 the effect of relative brain size, so other parameter estimates should be interpreted with caution (42).

243

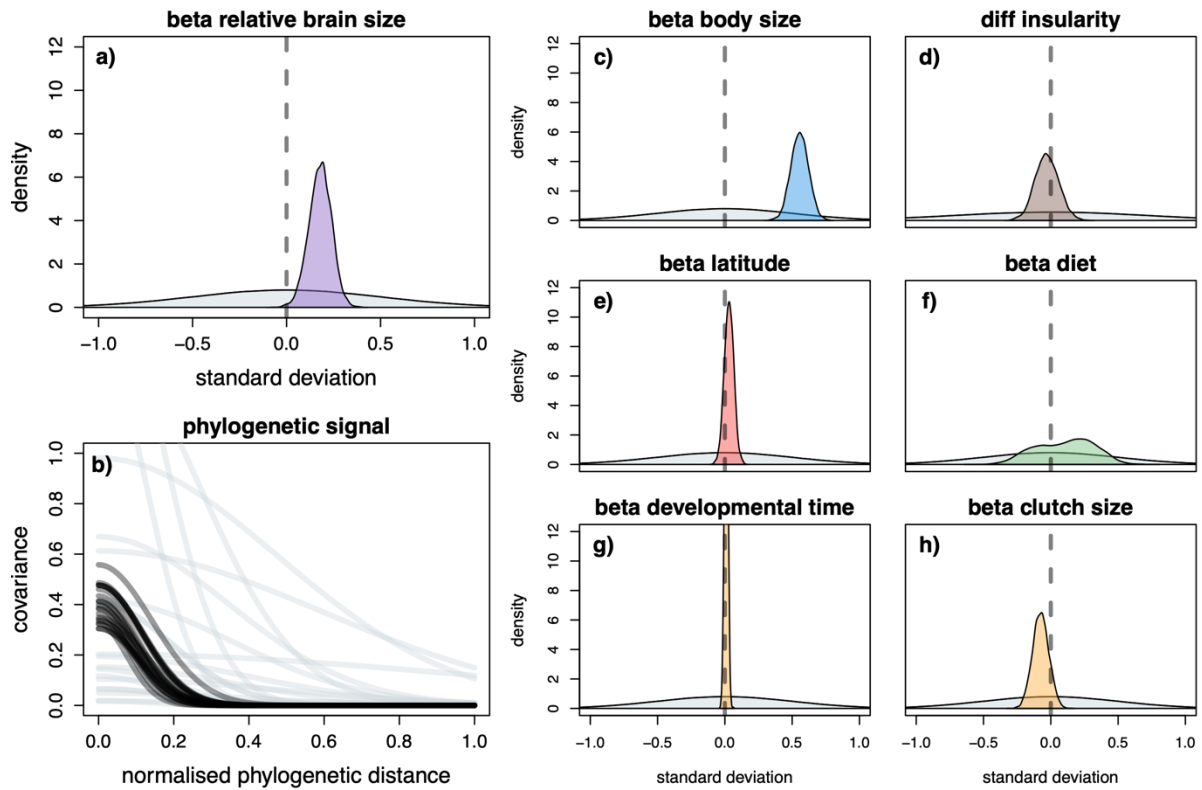

244

245 **Figure 3.** Parameter estimates for model 2. For results of model 1 and 3 see Figure S2 and S4. Grey density  
246 plots and lines are the regularising priors. Coloured areas are the posterior densities for the parameter estimates  
247 controlling the effect of the covariates on life expectancy. Black lines are 20 samples of the posterior for the  
248 phylogenetic covariance. For insularity the difference between islandic and continental species is shown.

249

250

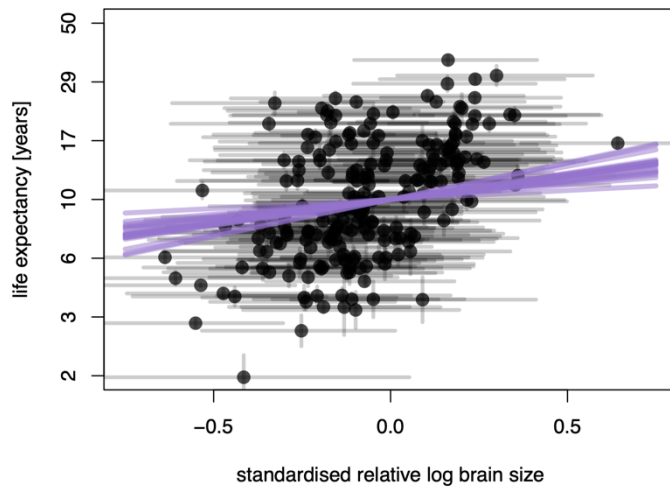

251

252 **Figure 4.** Standardised relative log brain size vs life expectancy for model 2. Black points represent 217 species  
253 where life expectancy was available, vertical black lines represent the SE for life expectancy, horizontal black  
254 lines represent the 89% percentile intervals for standardised relative log brain size. Purple lines represent 20  
255 samples from the posterior for the slope (beta) of the effect of standardised relative log brain size on life  
256 expectancy.

257

## 258 Discussion

259

260 Using an extensive database from captive parrots, our study showed a clear and positive correlation  
261 between relative brain size and life expectancy in parrots. We further tested two hypotheses to  
262 explain this observed correlation between relative brain size and life expectancy: the *Cognitive Buffer*  
263 *Hypothesis* (12) and the *Expensive Brain Hypothesis* (14). Our results best supported a direct  
264 relationship between larger brains and longer life expectancy, as predicted under the *Cognitive Buffer*  
265 *Hypothesis*. It should be noted that this result is also consistent with the *Delayed Benefits Hypothesis*  
266 (13). These hypotheses could not be disentangled in this analysis, as both predict a direct relationship  
267 between life expectancy and cognition, albeit with reversed directionality. Future studies could  
268 additionally try to use process-based approaches (where evolution is modelled explicitly), such as  
269 generative inference (43) or Bayesian ancestral state reconstruction (44) to disentangle the direction  
270 of causality. However, we found no evidence that the relationship between relative brain size and life  
271 expectancy was explained by the need for longer development times (here measured by incubation to  
272 fledging time, and by age of first reproduction), or by increased parental investment (here represented

273 by clutch size), as predicted by the *Expensive Brain Hypothesis*. Interestingly, our results differ from a  
274 previous study in parrots by Munshi-South et al. (18). This study found that the protein content of diets  
275 and communal roosting best explained variation in maximum longevity. Data on sociality is largely  
276 lacking for parrots, so we did not test for an effect of sociality, but we found no effect of diet. However,  
277 Munshi-South et al. did not consider brain size in their analysis. Since diet potentially determines  
278 whether and how quickly brains can grow (45), protein intake could still have an indirect effect on  
279 longevity via its potential link with brain size.

280

281 The lack of support for the *Expensive Brain Hypothesis* is contrary to previous studies in primates  
282 (11,46), other mammals (47,48), and amphibians (10), all of which show a positive correlation  
283 between developmental time or AFR and life expectancy. However, it is in line with previous work  
284 examining the evolution of longevity in birds (17). To explain this discrepancy between birds and  
285 mammals, Isler et al. (15) suggested that bird species with allomaternal care (care provided for  
286 mother or offspring by either the father or helpers) can provide enough nutrition for relatively larger  
287 brained offspring without the need to prolong developmental periods or reduce clutch size to an extent  
288 that would lead to the co-evolution of increased lifespans. All parrots have relatively large brain sizes  
289 compared to most other birds, and all parrot species exhibit biparental care. Almost all parrots are  
290 also cavity nesters. Cavity nests are less vulnerable to predation, and often have extensive nest  
291 defence strategies, and so can have relatively relaxed selective pressure on fledging times as  
292 compared to open-cup nesters (49). Perhaps the combination of these factors provides enough  
293 flexibility to deal with heightened nutritional demands of rearing large-brained offspring without  
294 selection on developmental times. This does not, however, diminish the importance of cognitive  
295 development in parrots. The extended juvenile periods observed in many parrot species of up to six  
296 years may provide enhanced opportunities for social learning, as proposed for another large-brained  
297 bird taxon, the corvids (50). This hypothesis remains to be tested in parrots.

298

299 To our knowledge this is the first study of life expectancy and/or brain size that uses a bespoke  
300 Bayesian model to include: 1) uncertainty about variable estimates; 2) imputation of missing values;  
301 3) a principled representation of relative brain size; and 4) phylogenetic signal. In our opinion, this

302 method has some major advantages. Most notably, we could estimate both life expectancy and its  
303 uncertainty in each species. This allowed us to fully exploit the fact that we have a hundred-fold more  
304 data for some species, instead of relying on a single point estimate of maximum longevity. We also  
305 imputed life expectancy for species which have no data. This is likely to be important in most datasets  
306 to account for biased data collection, but it is especially important when using data from captivity,  
307 because zoos never randomly pick species to be included in their population, leading to a bias toward  
308 larger and longer-lived species (51). Complete case analysis will introduce bias in this case (52) and  
309 we therefore chose to impute missing values. Our model structure can be easily adapted to impute  
310 any continuous variable.

311

312 Our study also departs from most previous studies of longevity by using data from captivity on life  
313 expectancy (38,53–55). This provided several important advantages. First, it provided a large sample  
314 size, both improving the estimation of life expectancy per species and allowing us to have a fuller  
315 representation of species. Second, captivity reduces external sources of mortality as much as  
316 possible (little predation, starvation, etc.). However, captive data poses different challenges. First,  
317 similarly to data from the wild, birth and death dates can be missing (e.g., for individuals born in the  
318 wild or transferred from institutions that are not part of ZIMS). The BaSTA implementation that we  
319 used imputed these missing values, and we believe that our thorough cleaning procedure, coupled  
320 with the sheer magnitude of the dataset, means that any gaps, data entry errors or biases should  
321 have minimal effect on the life expectancies presented here. Third, there may be differences in  
322 causes of death in captivity and the wild, for example if some species are difficult to keep or prone to  
323 negative behavioural responses to captivity which is also true for some of the shortest-lived genera  
324 included in the study such as *Psittaculirostris* and *Charmosyna* which have been historically difficult to  
325 manage in captivity. We dealt with this by excluding potentially problematic species from the initial life  
326 expectancy estimations, and instead imputed values in the final model (see Supplemental Methods  
327 for details). We can still not be completely sure that the patterns observed in the data are all  
328 representative of the evolutionary processes that shaped them, but it is highly unlikely that the clear  
329 positive correlation between relative brain size and life expectancy is due to captivity.

330

331 **Conclusions**

332

333 Overall, our results are consistent with the *Cognitive Buffer Hypothesis*, suggesting that relatively  
334 large brains may have buffered parrots against environmental variability and/or predation threats  
335 reducing sources of extrinsic mortality and allowing longer lifespans. This result is consistent with  
336 previous studies in other birds, suggesting that common processes may explain longevity in altricial  
337 birds. As well as longevity, parrots are famous for their complex cognition. It remains largely unknown  
338 what evolutionary processes have driven cognitive evolution in parrots, but given the results of our  
339 study, in addition to those of Munshi-South et al. (18), future work should further investigate the  
340 potentially complex feedbacks between these two factors and sociality and diet. Unfortunately, longer  
341 lived species are also more likely to be threatened (26), showing the vulnerability of this order. Having  
342 life expectancy and other life history variables for hundreds of species will hopefully aid in future  
343 conservation efforts for this globally threatened order.

344

345 **Data, code and materials**

346 Data will be made publicly available upon publication. Code is publicly available at  
347 [https://github.com/simeonqs/Coevolution\\_of\\_brain\\_size\\_and\\_longevity\\_in\\_parrots](https://github.com/simeonqs/Coevolution_of_brain_size_and_longevity_in_parrots).

348

349 **Competing interests**

350 The authors have no competing interests with this study.

351

352 **Author Contributions**

353 AY, DAC, LMA, MBM and SQS conceived the idea. AI, AY, LA, TW, SB and SQS collected the data.  
354 SQS analysed the data under supervision from LA and MBM. AB, DAC, LA, MBM and SQS drafted  
355 the initial manuscript, and all authors contributed to writing and editing the final article. All contributors  
356 are listed in alphabetical order.

357

358 **Acknowledgments**

359 We would like to thank Dr. Dieter Lukas, Dr. Cody Ross, Prof. Fernando Colchero, Prof. Richard  
360 McElreath and Dr. Rita da Silva for their advice on the analysis. We would further like to thank the  
361 more than 1,300 Species360 members for registering their animals in the ZIMS database. We thank  
362 Prof. Alejandro Salinas, Geddes Hislop and Johann C. Carstens for contributing data on diet.

363

#### 364 **Funding**

365 This project was possible thanks to the financial support of the sponsor members of the Species360  
366 Conservation Science Alliance (Copenhagen Zoo, the World Association of Zoos and Aquariums, and  
367 the Wildlife Reserves of Singapore), the Interdisciplinary Centre on Population Dynamics and the  
368 Biology Department at the University of Southern Denmark. We would like to thank Species360 for  
369 granting access to the data under permission number #86892. This work was supported by the Max  
370 Planck Society. LMA was funded by a Max Planck Independent Group Leader Fellowship. SQS  
371 received additional funding from the International Max Planck Research School for Organismal  
372 Biology.



373 **References**

- 374 1. Medawar PB, University College London. An Unsolved problem of biology; an inaugural lecture  
375 delivered at University College, London, 6 December, 1951. London: H.K. Lewis and Co.; 1952.
- 376 2. Williams GC. Pleiotropy, natural selection, and the evolution of senescence. *evolution*. 1957;398–  
377 411.
- 378 3. Hamilton WD. The moulding of senescence by natural selection. *J Theor Biol*. 1966;12(1):12–45.
- 379 4. Kirkwood TB. Evolution of ageing. *Nature*. 1977;270(5635):301–4.
- 380 5. Jones OR, Scheuerlein A, Salguero-Gómez R, Camarda CG, Schaible R, Casper BB, et al.  
381 Diversity of ageing across the tree of life. *Nature*. 2014;505(7482):169–73.
- 382 6. Colchero F, Jones OR, Conde DA, Hodgson D, Zajitschek F, Schmidt BR, et al. The diversity of  
383 population responses to environmental change. *Ecol Lett*. 2019;22(2):342–53.
- 384 7. Lindstedt SL, Calder III WA. Body size, physiological time, and longevity of homeothermic  
385 animals. *Q Rev Biol*. 1981;56(1):1–16.
- 386 8. Wasser D, Sherman P. Avian longevities and their interpretation under evolutionary theories of  
387 senescence. *J Zool*. 2010;280(2):103–55.
- 388 9. Scholer MN, Strimas-Mackey M, Jankowski JE. A meta-analysis of global avian survival across  
389 species and latitude. *Ecol Lett*. 2020;23(10):1537–49.
- 390 10. Yu X, Zhong MJ, Li DY, Jin L, Liao WB, Kotrschal A. Large-brained frogs mature later and live  
391 longer. *Evolution*. 2018;72(5):1174–83.
- 392 11. Street SE, Navarrete AF, Reader SM, Laland KN. Coevolution of cultural intelligence, extended  
393 life history, sociality, and brain size in primates. *Proc Natl Acad Sci*. 2017;114(30):7908–14.
- 394 12. Allman J, McLaughlin T, Hakeem A. Brain weight and life-span in primate species. *Proc Natl*  
395 *Acad Sci*. 1993;90(1):118–22.
- 396 13. Kaplan H, Hill K, Lancaster J, Hurtado AM. A theory of human life history evolution: Diet,  
397 intelligence, and longevity. *Evol Anthropol Issues News Rev Issues News Rev*. 2000;9(4):156–  
398 85.
- 399 14. Isler K, van Schaik CP. The expensive brain: a framework for explaining evolutionary changes in  
400 brain size. *J Hum Evol*. 2009;57(4):392–400.
- 401 15. Isler K, Van Schaik CP. Why are there so few smart mammals (but so many smart birds)? *Biol*  
402 *Lett*. 2009;5(1):125–9.
- 403 16. DeCasien AR, Thompson NA, Williams SA, Shattuck MR. Encephalization and longevity evolved  
404 in a correlated fashion in Euarchontoglires but not in other mammals. *Evolution*.  
405 2018;72(12):2617–31.
- 406 17. Jiménez-Ortega D, Kolm N, Immler S, Maklakov AA, Gonzalez-Voyer A. Long life evolves in  
407 large-brained bird lineages. *Evolution*. 2020;74(12):2617–28.
- 408 18. Munshi-South J, Wilkinson GS. Diet influences life span in parrots (Psittaciformes). *The Auk*.  
409 2006;123(1):108–18.
- 410 19. Auersperg AM, von Bayern AM. Who's a clever bird—now? A brief history of parrot cognition.  
411 *Behaviour*. 2019;156(5–8):391–407.

- 412 20. Olkowicz S, Kocourek M, Lučan RK, Porteš M, Fitch WT, Herculano-Houzel S, et al. Birds have  
413 primate-like numbers of neurons in the forebrain. *Proc Natl Acad Sci*. 2016;113(26):7255–60.
- 414 21. Costantini D, Racheli L, Cavallo D, Dell’Omo G. Genome size variation in parrots: longevity and  
415 flying ability. *J Avian Biol*. 2008;39(4):453–9.
- 416 22. Andrews CB, Gregory TR. Genome size is inversely correlated with relative brain size in parrots  
417 and cockatoos. *Genome*. 2009;52(3):261–7.
- 418 23. Wirthlin M, Lima NC, Guedes RLM, Soares AE, Almeida LGP, Cavaleiro NP, et al. Parrot  
419 genomes and the evolution of heightened longevity and cognition. *Curr Biol*. 2018;28(24):4001-  
420 4008. e7.
- 421 24. Dunning Jr JB. *CRC handbook of avian body masses*. CRC press; 2007.
- 422 25. Schuck-Paim C, Alonso WJ, Ottoni EB. Cognition in an ever-changing world: climatic variability is  
423 associated with brain size in neotropical parrots. *Brain Behav Evol*. 2008;71(3):200–15.
- 424 26. Young AM, Hobson EA, Lackey LB, Wright TF. Survival on the ark: life-history trends in captive  
425 parrots. *Anim Conserv*. 2012;15(1):28–43.
- 426 27. Conde DA, Staerk J, Colchero F, da Silva R, Schöley J, Baden HM, et al. Data gaps and  
427 opportunities for comparative and conservation biology. *Proc Natl Acad Sci*. 2019;116(19):9658–  
428 64.
- 429 28. Vaupel JW. Post-darwinian longevity. *Popul Dev Rev*. 2003;29:258–69.
- 430 29. Wrycza TF, Baudisch A. The pace of aging: Intrinsic time scales in demography. *Demogr Res*.  
431 2014;30:1571–90.
- 432 30. Laubach ZM, Murray EJ, Hoke KL, Safran RJ, Perng W. A biologist’s guide to model selection  
433 and causal inference. *Proc R Soc B*. 2021;288(1943):20202815.
- 434 31. Pearl J, Glymour M, Jewell NP. *Causal inference in statistics: A primer*. John Wiley & Sons; 2016.
- 435 32. Colchero F, Jones OR, Rebke M. BaSTA: an R package for Bayesian estimation of age-specific  
436 survival from incomplete mark–recapture/recovery data with covariates. *Methods Ecol Evol*.  
437 2012;3(3):466–70.
- 438 33. R Core Team. *R: A language and environment for statistical computing*. 2013; Available from:  
439 <https://www.R-project.org/>
- 440 34. Siler W. A competing-risk model for animal mortality. *Ecology*. 1979;60(4):750–7.
- 441 35. Gelman A, Carlin JB, Stern HS, Dunson DB, Vehtari A, Rubin DB. *Bayesian data analysis*. CRC  
442 press; 2013.
- 443 36. Iwaniuk AN, Dean KM, Nelson JE. Interspecific allometry of the brain and brain regions in parrots  
444 (*Psittaciformes*): comparisons with other birds and primates. *Brain Behav Evol*. 2005;65(1):40–  
445 59.
- 446 37. Ksepka DT, Balanoff AM, Smith NA, Bever GS, Bhullar B-AS, Bourdon E, et al. Tempo and  
447 pattern of avian brain size evolution. *Curr Biol*. 2020;30(11):2026-2036. e3.
- 448 38. Scholer MN, Strimas-Mackey M, Jankowski JE. A meta-analysis of global avian survival across  
449 species and latitude. *Ecol Lett*. 2020;23(10):1537–49.

- 450 39. Ghalambor CK, Martin TE. Fecundity-survival trade-offs and parental risk-taking in birds. *Science*.  
451 2001;292(5516):494–7.
- 452 40. Burgio KR, Davis KE, Dreiss LM, Cisneros LM, Klingbeil BT, Presley SJ, et al. Phylogenetic  
453 supertree and functional trait database for all extant parrots. *Data Brief*. 2019;24:103882.
- 454 41. Freckleton RP. On the misuse of residuals in ecology: regression of residuals vs. multiple  
455 regression. *J Anim Ecol*. 2002;542–5.
- 456 42. Westreich D, Greenland S. The table 2 fallacy: presenting and interpreting confounder and  
457 modifier coefficients. *Am J Epidemiol*. 2013;177(4):292–8.
- 458 43. Kandler A, Powell A. Generative inference for cultural evolution. *Philos Trans R Soc B Biol Sci*.  
459 2018;373(1743):20170056.
- 460 44. Ringen E, Martin JS, Jaeggi A. Novel phylogenetic methods reveal that resource-use  
461 intensification drives the evolution of “complex” societies. 2021;
- 462 45. Robson S. Breast milk, diet, and large human brains. *Curr Anthropol*. 2004;45(3):419–25.
- 463 46. Powell LE, Barton RA, Street SE. Maternal investment, life histories and the evolution of brain  
464 structure in primates. *Proc R Soc B*. 2019;286(1911):20191608.
- 465 47. González-Lagos C, Sol D, Reader S. Large-brained mammals live longer. *J Evol Biol*.  
466 2010;23(5):1064–74.
- 467 48. Barton RA, Capellini I. Maternal investment, life histories, and the costs of brain growth in  
468 mammals. *Proc Natl Acad Sci*. 2011;108(15):6169–74.
- 469 49. Martin TE. Nest predation and nest sites. *BioScience*. 1993;43(8):523–32.
- 470 50. Uomini N, Fairlie J, Gray RD, Griesser M. Extended parenting and the evolution of cognition.  
471 *Philos Trans R Soc B*. 2020;375(1803):20190495.
- 472 51. Frynta D, Lišková S, Bültmann S, Burda H. Being attractive brings advantages: the case of parrot  
473 species in captivity. *PloS One*. 2010;5(9):e12568.
- 474 52. Little RJ, Rubin DB. *Statistical analysis with missing data*. *Stat Anal Missing Data*. 2002;
- 475 53. Blumstein DT, Møller AP. Is sociality associated with high longevity in North American birds? *Biol*  
476 *Lett*. 2008;4(2):146–8.
- 477 54. Beauchamp G. Group-foraging is not associated with longevity in North American birds. *Biol Lett*.  
478 2010;6(1):42–4.
- 479 55. Arnold KE, Owens IP. Cooperative breeding in birds: a comparative test of the life history  
480 hypothesis. *Proc R Soc Lond B Biol Sci*. 1998;265(1398):739–45.

481
